## CORRESPONDENCE

Drug Administration (FDA). The indication for postoperative analgesic infusion of remifentanyl stipulates that it must be administered under the direct supervision of an anesthesia practitioner.

To measure  $PCO_2$  in the PACU with arterial blood gases would have required a far more invasive technique than was warranted for these patients. Future investigations could include end-tidal  $CO_2$  and a more detailed analysis of respiratory pattern.

Anesthesiology  
1998; 88:1126-7  
© 1998 American Society of Anesthesiologists, Inc.  
Lippincott-Raven Publishers

Joel Mann Yarmush, M.D.  
Department of Anesthesiology  
New Jersey Medical School  
185 South Orange Avenue  
University Heights  
Newark, New Jersey 07103-2714

(Accepted for publication December 2, 1997.)

## Predicting the Severity of Carbon Monoxide Poisoning at Varying $FI_{O_2}$

*To the Editor:*—Frink *et al.*<sup>1</sup> showed that extremely high carboxyhemoglobin (COHb) concentrations can be produced in 25-kg pigs by the inhalation of desflurane through a breathing circuit with dried  $CO_2$  absorbents, which produce carbon monoxide (CO) through anesthetic breakdown. These experiments were performed at 40% inspired oxygen, although in clinical practice, inspired oxygen concentrations can vary from less than 25% to nearly 100%, impacting the resultant severity of CO poisoning as measured by COHb concentrations.

We attempt to exemplify the clinical effect of various inspired oxygen concentrations during the rapidly changing CO concentrations produced by desflurane breakdown by using mathematical modeling to extrapolate the data of Frink *et al.* We interpolated parts per million CO from the graphic data presented in figures 3 and 4 of the study by Frink *et al.* and applied these data to the equation developed by Coburn *et al.*,<sup>2</sup> (CFK equation) to determine the COHb concentration. Good experimental fit of this equation has been documented by Peterson *et al.*<sup>3</sup> We used this equation to calculate the accumulation of COHb as a function of the absorption and elimination of CO through respiration using Microsoft Excel (Microsoft Corporation) for the Macintosh (Apple Computer, Inc., Cupertino, CA). The implementation of the CFK equation required that assumptions be made to complete the respiratory profile, as shown in table 1. We used the CFK equation to calculate the COHb concentration by an iterative method using CO concentrations interpolated from the graphic data of Frink *et al.* To validate the appropriateness of using the CFK

Table 1. Assumed Values for Experimental Data

| Parameter           | Value                                                        |
|---------------------|--------------------------------------------------------------|
| Weight              | 25 kg                                                        |
| Tidal volume        | 275 ml                                                       |
| Respiratory rate    | 10 $\text{min}^{-1}$                                         |
| Dead space          | 68 ml                                                        |
| Body surface area   | 0.6 $\text{m}^2$                                             |
| Hemoglobin          | 14.0 g/dl                                                    |
| Barometric pressure | 750 mmHg                                                     |
| Blood volume        | 1875 ml                                                      |
| $DL_{CO}$           | 5.9 $\text{ml} \cdot \text{min}^{-1} \cdot \text{mmHg}^{-1}$ |

Effect of  $FI_{O_2}$  on COHb Concentration

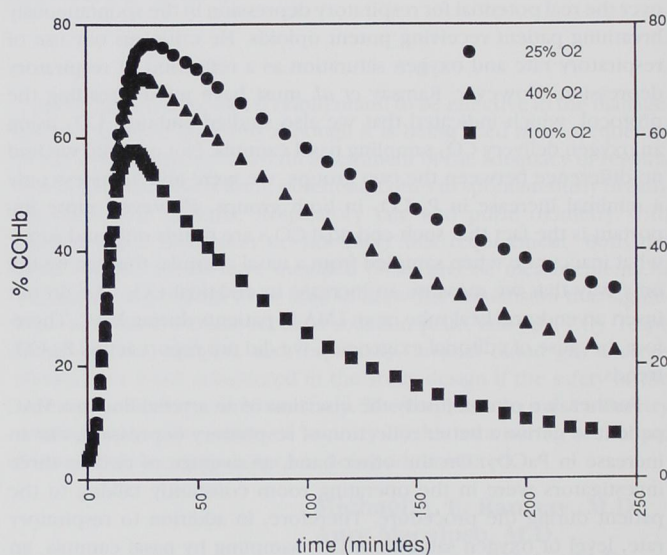

Fig. 1. Shows the concentration of CO (open circles) in parts per million (ppm) interpolated from the graphic data of Frink *et al.* This figure also compares COHb % calculated at 40% inspired oxygen from these data (small triangles) using the CFK equation for comparison with the experimental COHb % taken from the graphic data of Frink *et al.* The experimental COHb data correlate well with those predicted by the CFK equation.

equation, we graphically show the correlation of the calculated COHb data to the measured experimental data of Frink *et al.* in figure 1. This results in an  $r^2$  value of 0.997 for the descending data points and an overall  $r^2$  value of 0.967. Several possible explanations exist for the slight deviation of the experimental and calculated data during the ascending phase of the curve. It is possible that physiologic parameters (e.g., cardiac output) were severely compromised during this phase of the experiment, and differences reflected changes in circulation in the experimental animals from those for which the



## CORRESPONDENCE

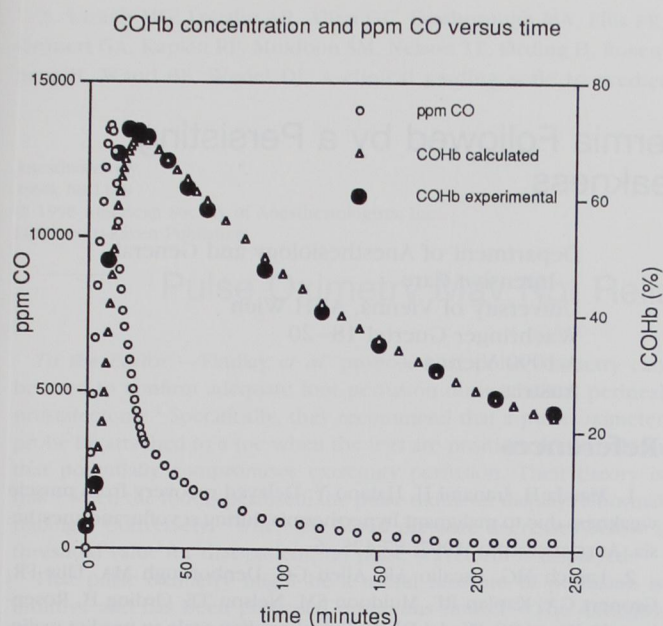

Fig. 2. Shows the predicted concentration of COHb in % resulting from the use of the CFK equation as a function of time at different inspired oxygen concentrations. The data at 40% O<sub>2</sub> are identical to those in figure 1.

CFK equation was developed. Despite these limitations, the CFK equation provides excellent predictions under these extreme conditions.

In figure 2, we show the results of mathematical modeling using the CFK equation to extrapolate the CO concentration data to different

inspired oxygen concentrations (FiO<sub>2</sub>). These COHb concentrations would be predicted to result from exposure to the CO concentrations interpolated from the data of Frink *et al.* and also at 100% and 25% oxygen. Predicted results at 100% oxygen yielded smaller COHb concentrations, possibly accounting for the low incidence of CO poisoning detected by clinical signs. Conversely, the predicted results at 25% oxygen suggest that CO toxicity would be enhanced under these conditions. The routine use of an increased FiO<sub>2</sub> may reduce CO poisoning during anesthesia because of the competitive binding of CO and oxygen, but CO poisoning occurring with low FiO<sub>2</sub> may be more severe.

Harvey J. Woehlck, M.D.

Associate Professor of Anesthesiology

Marshall B. Dunning III, Ph.D.

Assistant Professor of Medicine

Medical College of Wisconsin

Milwaukee, Wisconsin 53226

rkost@mail.fmlh.edu

## References

1. Frink EJ, Nogami WM, Morgan SE, Salmon RC: High carboxyhemoglobin concentrations occur in swine during desflurane anesthesia in the presence of partially dried carbon dioxide absorbents. *ANESTHESIOLOGY* 1997; 87(2):308-16
2. Coburn RF, Forster RE, Kane PB: Considerations of the physiological variables that determine the blood carboxyhemoglobin concentration in man. *J Clin Invest* 1965; 44(11):1899-910
3. Peterson JE, Stewart RD: Absorption and elimination of carbon monoxide by inactive young men. *Arch Environ Health* 1970; 21(2):165-71

(Accepted for publication December 2, 1997.)

Anesthesiology

1998; 88:1127

© 1998 American Society of Anesthesiologists, Inc.

Lippincott-Raven Publishers

**In Reply:**—We appreciate the additional calculations of Drs. Woehlck and Dunning to our published data regarding calculated carboxyhemoglobin concentrations from CO exposure with desflurane and dry CO<sub>2</sub> absorbent. From our CO data, the calculated data by Woehlck and Dunning closely approximates our observed carboxyhemoglobin concentrations with 40% O<sub>2</sub> in pigs, which is encouraging. Their calculation involves several assumptions concerning ventilatory values, as shown in their table 1. Although these values for individual animals are not exact, the values closely approximate those of the mean for our study animals, and hence their calculated values parallel our experimental results. Their calculations for carboxyhemoglobin with 25% and 100% O<sub>2</sub> concentrations are useful additions—particularly the data regarding results in 100% O<sub>2</sub>, as this oxygen concentration would often be used by practitioners during the first few minutes of anesthesia when the greatest CO exposure

is occurring. Several other variables will likely alter the CO exposure and resultant carboxyhemoglobin concentrations. These include the use of a higher fresh gas flow rate and lower anesthetic concentration, both of which might reduce the degree of CO exposure that occurs. These several factors, along with our inability to readily detect CO exposure, likely produce the low incidence of reports regarding this phenomenon.

Edward J. Frink, Jr., M.D.

Wallace M. Nogami, M.D.

Department of Anesthesiology

The University of Arizona Health Sciences Center

Tucson, Arizona 85724-5114

(Accepted for publication December 2, 1997.)
